# Supplementary material
Source: PubMed Central journal article supplement (PMC6969287)
Supplement: mmc1.pdf [file mmc1.pdf]

## Mechanical Properties of the In Vivo Adolescent Human Brain

Grace McIlvain, Hillary Schwarb, Neal J Cohen, Eva H Telzer, Curtis L Johnson

Supplemental Information

### *Sex differences in regional mechanical properties*

**Table S1:** Shear stiffness,  $\mu$ , of cerebral lobes and subcortical gray matter structures in male and female adolescents, and Cohen's  $d$  effect size indicating the difference between males and females. Population mean (standard deviation) in kPa.

| Region         | Male $\mu$  | Female $\mu$ | Cohen's $d$ |
|----------------|-------------|--------------|-------------|
| Cerebrum       | 3.12 (0.28) | 3.14 (0.35)  | -0.08       |
| Cerebellum     | 2.44 (0.17) | 2.52 (0.34)  | -0.31       |
| Frontal Lobe   | 2.97 (0.25) | 2.98 (0.38)  | -0.04       |
| Occipital Lobe | 2.85 (0.28) | 2.75 (0.23)  | 0.37        |
| Parietal Lobe  | 2.84 (0.27) | 2.84 (0.44)  | 0.02        |
| Temporal Lobe  | 3.01 (0.21) | 3.02 (0.29)  | -0.05       |
| Deep GM/WM     | 3.43 (0.40) | 3.54 (0.48)  | -0.25       |
| Amygdala       | 3.37 (0.29) | 3.60 (0.49)  | -0.56       |
| Hippocampus    | 3.09 (0.47) | 3.39 (0.58)  | -0.54       |
| Caudate        | 4.05 (0.38) | 4.17 (0.42)  | -0.30       |
| Putamen        | 3.98 (0.28) | 4.02 (0.36)  | -0.14       |
| Pallidum       | 3.91 (0.32) | 4.01 (0.39)  | -0.27       |
| Thalamus       | 3.96 (0.25) | 4.09 (0.40)  | -0.39       |

**Table S2:** Damping ratio,  $\zeta$ , of cerebral lobes and subcortical gray matter structures in male and female adolescents, and Cohen's  $d$  effect size indicating the difference between males and females. Population mean (standard deviation).

| Region         | Male $\zeta$  | Female $\zeta$ | Cohen's $d$ |
|----------------|---------------|----------------|-------------|
| Cerebrum       | 0.229 (0.018) | 0.221 (0.024)  | 0.36        |
| Cerebellum     | 0.278 (0.037) | 0.293 (0.060)  | -0.28       |
| Frontal Lobe   | 0.223 (0.018) | 0.210 (0.023)  | 0.65        |
| Occipital Lobe | 0.258 (0.052) | 0.281 (0.067)  | -0.37       |
| Parietal Lobe  | 0.247 (0.030) | 0.247 (0.038)  | 0.00        |
| Temporal Lobe  | 0.238 (0.032) | 0.237 (0.029)  | 0.04        |
| Deep GM/WM     | 0.224 (0.021) | 0.213 (0.026)  | 0.42        |
| Amygdala       | 0.226 (0.032) | 0.218 (0.044)  | 0.22        |
| Hippocampus    | 0.185 (0.027) | 0.190 (0.036)  | -0.13       |
| Caudate        | 0.215 (0.025) | 0.197 (0.028)  | 0.66        |
| Putamen        | 0.214 (0.018) | 0.206 (0.022)  | 0.38        |
| Pallidum       | 0.204 (0.017) | 0.195 (0.017)  | 0.49        |
| Thalamus       | 0.195 (0.020) | 0.189 (0.018)  | 0.34        |

*Effect size of individual comparisons between regions*

**Table S3:** Effect size (Cohen's *d*) of individual comparisons between cerebral lobe stiffness,  $\mu$ .

|                   |                 |                   |                |                  |                 |                 |                   |
|-------------------|-----------------|-------------------|----------------|------------------|-----------------|-----------------|-------------------|
| <b>Cerebrum</b>   |                 |                   |                |                  |                 |                 |                   |
| <b>Cerebellum</b> | 1.99            |                   |                |                  |                 |                 |                   |
| <b>Frontal</b>    | 0.48            | 1.52              |                |                  |                 |                 |                   |
| <b>Occipital</b>  | 1.01            | 0.98              | 0.54           |                  |                 |                 |                   |
| <b>Parietal</b>   | 0.89            | 1.10              | 0.42           | 0.12             |                 |                 |                   |
| <b>Temporal</b>   | 0.35            | 1.64              | 0.12           | 0.66             | 0.54            |                 |                   |
| <b>Deep GM/WM</b> | 1.10            | 3.09              | 1.57           | 2.11             | 1.99            | 1.45            |                   |
|                   | <b>Cerebrum</b> | <b>Cerebellum</b> | <b>Frontal</b> | <b>Occipital</b> | <b>Parietal</b> | <b>Temporal</b> | <b>Deep GM/WM</b> |

**Table S4:** Effect size (Cohen's *d*) of individual comparisons between subcortical gray matter structure stiffness,  $\mu$ .

|                    |                 |                 |                    |                |                |                 |                 |
|--------------------|-----------------|-----------------|--------------------|----------------|----------------|-----------------|-----------------|
| <b>Cerebrum</b>    |                 |                 |                    |                |                |                 |                 |
| <b>Amygdala</b>    | 0.92            |                 |                    |                |                |                 |                 |
| <b>Hippocampus</b> | 0.30            | 0.63            |                    |                |                |                 |                 |
| <b>Caudate</b>     | 2.50            | 1.58            | 2.21               |                |                |                 |                 |
| <b>Putamen</b>     | 2.22            | 1.30            | 1.92               | 0.28           |                |                 |                 |
| <b>Pallidum</b>    | 2.11            | 1.19            | 1.81               | 0.39           | 0.11           |                 |                 |
| <b>Thalamus</b>    | 2.28            | 1.36            | 1.99               | 0.22           | 0.06           | 0.17            |                 |
|                    | <b>Cerebrum</b> | <b>Amygdala</b> | <b>Hippocampus</b> | <b>Caudate</b> | <b>Putamen</b> | <b>Pallidum</b> | <b>Thalamus</b> |

**Table S5:** Effect size (Cohen's *d*) of individual comparisons between cerebral lobe damping ratio,  $\zeta$ .

|                   |                 |                   |                |                  |                 |                 |                   |
|-------------------|-----------------|-------------------|----------------|------------------|-----------------|-----------------|-------------------|
| <b>Cerebrum</b>   |                 |                   |                |                  |                 |                 |                   |
| <b>Cerebellum</b> | 1.63            |                   |                |                  |                 |                 |                   |
| <b>Frontal</b>    | 0.24            | 1.87              |                |                  |                 |                 |                   |
| <b>Occipital</b>  | 1.20            | 0.44              | 1.44           |                  |                 |                 |                   |
| <b>Parietal</b>   | 0.60            | 1.04              | 0.84           | 0.60             |                 |                 |                   |
| <b>Temporal</b>   | 0.34            | 1.29              | 0.58           | 0.86             | 0.26            |                 |                   |
| <b>Deep GM/WM</b> | 0.18            | 1.82              | 0.06           | 1.38             | 0.78            | 0.52            |                   |
|                   | <b>Cerebrum</b> | <b>Cerebellum</b> | <b>Frontal</b> | <b>Occipital</b> | <b>Parietal</b> | <b>Temporal</b> | <b>Deep GM/WM</b> |

**Table S6:** Effect size (Cohen's *d*) of individual comparisons between subcortical gray matter structure in damping ratio,  $\zeta$ .

|                    |                 |                 |                    |                |                |                 |                 |
|--------------------|-----------------|-----------------|--------------------|----------------|----------------|-----------------|-----------------|
| <b>Cerebrum</b>    |                 |                 |                    |                |                |                 |                 |
| <b>Amygdala</b>    | 0.13            |                 |                    |                |                |                 |                 |
| <b>Hippocampus</b> | 1.42            | 1.30            |                    |                |                |                 |                 |
| <b>Caudate</b>     | 0.76            | 0.63            | 0.67               |                |                |                 |                 |
| <b>Putamen</b>     | 0.60            | 0.47            | 0.83               | 0.16           |                |                 |                 |
| <b>Pallidum</b>    | 0.98            | 0.85            | 0.45               | 0.22           | 0.38           |                 |                 |
| <b>Thalamus</b>    | 1.27            | 1.14            | 0.16               | 0.51           | 0.67           | 0.29            |                 |
|                    | <b>Cerebrum</b> | <b>Amygdala</b> | <b>Hippocampus</b> | <b>Caudate</b> | <b>Putamen</b> | <b>Pallidum</b> | <b>Thalamus</b> |
